# Supplementary material for: DNA hypermethylation appears early and shows increased frequency with dysplasia in Lynch syndrome-associated colorectal adenomas and carcinomas
Source: PubMed Central journal article supplement (PMC4511034; doi:10.1186/s13148-015-0102-4), 2015-07-22
Supplement: 13148_2015_102_MOESM4_ESM.pdf [file 13148_2015_102_MOESM4_ESM.pdf]

Suppl. Table 3. (A) Bisulfite primer sequences and (B) MS-MLPA probe design for candidate gene panel.

A.

| Gene          | Forward (5'→3')                | Reverse (5'→3')                    | T <sub>a</sub> | Size (bp) | Reference          |
|---------------|--------------------------------|------------------------------------|----------------|-----------|--------------------|
| <i>DKK1</i>   | TTTTTTGAGTTTTTTGAGATGATG       | CTAACTACAAAACCTAAATACCCC           | 54°C/56°C      | 249       | This study         |
| <i>SFRP2</i>  | AATTAGATTTAGAAAGTAGTGATTAGT    | AACCAAAACCCTACAACATCRTAAAC         | 54°C           | 381       | [1]                |
| <i>CDH1</i>   | ATTTATTAGATTTTAGTAATTTTAGGTTAG | CAAATCAAAAATCCRAAATACCTACAACA      | 50°C           | 393       | This study         |
| <i>HOXD1</i>  | GTAGAGGATTTAGAAGAGGGGA         | AAAAAAACAAAACCTAAACRCTTAAATAAAAACC | 52°C/54°C      | 221       | [2] and this study |
| <i>SFRP5</i>  | GGGAGGTAGGGAGTTTTGGGGAGAA      | CCCAAAATAAATAACAACCTACRCTAC        | 56°C           | 277       | [1]                |
| <i>SLC5A8</i> | GAGGTTTTATATTTGGGTTTGAGG       | TAAACCCTACRCRCAAACCTAATAACCC       | 54°C/56°C      | 222       | [3] and this study |
| <i>SFRP1</i>  | GTTTTGTTTTTTAAGGGGTGTTGAG      | ACACTAACTCCRAAAACTACAAAAC          | 54°C/56°C      | 209       | [4]                |

B.

| Gene                      | Probe length <sup>a</sup> (bp) | Left hybridizing sequence (LHS) <sup>b</sup> | Right hybridizing sequence (RHS) <sup>b</sup> | Distance of the HhaI site from ATG |
|---------------------------|--------------------------------|----------------------------------------------|-----------------------------------------------|------------------------------------|
| <i>DKK1</i>               | 97                             | GGGAGTGAG <b>GCGC</b> CACCTGAACTCGGTT        | CTCAATTCCAACGCTATCAAGAACCTG                   | + 91 bp                            |
| <i>SFRP2</i> <sup>c</sup> | 114                            | AACGGCTCATTCTGCTCCCCGGGTGCGA                 | GCCCCCGGAGCT <b>GCGC</b> GCGGGCTTGCA          | - 198 bp                           |
| <i>CDH1</i>               | 119                            | CGACCGCACCCG <b>GCGC</b> CTGCCCTCGCT         | CGGCGTCCCCGCCAGCCATGGGCCCT                    | - 29 bp                            |
| <i>HOXD1</i>              | 124                            | CACCGGCC <b>GCGC</b> GTACGCTCCCATTTAAC       | CTTTTCCATGCCGCGACGCCCACTCCGC                  | - 546 bp                           |
| <i>SFRP5</i> <sup>c</sup> | 133                            | CCGAGCCGGGAGAGGG <b>GCGC</b> AAGACCT         | <b>GCGC</b> TGGGCGGGACGCTCGGGCAGGG            | LHS - 333 bp & RHS - 318 bp        |
| <i>SLC5A8</i>             | 139                            | CTGGAGGACGCCTCCAGTCCCCGCGGGAC                | GCCACGCCT <b>GCGC</b> CCAGGGATCCGGGAT         | - 91 bp                            |
| <i>SFRP1</i>              | 158                            | GATTGGCT <b>GCGC</b> GGGGCGGCTCCGA           | GGGCTCGGC CGTAGGAGCC CC GC                    | - 348 bp                           |

<sup>a</sup> Each MS-MLPA probe pair consists of two separate hybridizing sequences (LHS and RHS).

<sup>b</sup> HhaI restriction sites (GCGC) are in bold.

<sup>c</sup> Probe sequence published by Niskakoski et al. 2014 [5].

## References

1. Cheng YY, Yu J, Wong YP, Man EP, To KF, Jin VX et al. Frequent epigenetic inactivation of secreted frizzled-related protein 2 (SFRP2) by promoter methylation in human gastric cancer. *British journal of cancer*. 2007;97(7):895-901. doi:10.1038/sj.bjc.6603968.
2. Jacinto FV, Ballestar E, Ropero S, Esteller M. Discovery of epigenetically silenced genes by methylated DNA immunoprecipitation in colon cancer cells. *Cancer research*. 2007;67(24):11481-6. doi:10.1158/0008-5472.CAN-07-2687.
3. Park JY, Helm JF, Zheng W, Ly QP, Hodul PJ, Centeno BA et al. Silencing of the candidate tumor suppressor gene solute carrier family 5 member 8 (SLC5A8) in human pancreatic cancer. *Pancreas*. 2008;36(4):e32-9. doi:10.1097/MPA.0b013e3181630ffe.
4. Meng Y, Wang QG, Wang JX, Zhu ST, Jiao Y, Li P et al. Epigenetic inactivation of the SFRP1 gene in esophageal squamous cell carcinoma. *Digestive diseases and sciences*. 2011;56(11):3195-203. doi:10.1007/s10620-011-1734-7.
5. Niskakoski A, Kaur S, Staff S, Renkonen-Sinisalo L, Lassus H, Jarvinen HJ et al. Epigenetic analysis of sporadic and Lynch-associated ovarian cancers reveals histology-specific patterns of DNA methylation. *Epigenetics : official journal of the DNA Methylation Society*. 2014;9(12):1577-87. doi:10.4161/15592294.2014.983374.
