# Supplementary material for: DNA hypermethylation appears early and shows increased frequency with dysplasia in Lynch syndrome-associated colorectal adenomas and carcinomas
Source: PubMed Central journal article supplement (PMC4511034; doi:10.1186/s13148-015-0102-4), 2015-07-22
Supplement: 13148_2015_102_MOESM5_ESM.pdf [file 13148_2015_102_MOESM5_ESM.pdf]

**Suppl. Table 4.** Cell line characteristics.

| Cell line | Type of cancer                     | MMR Status                                   | Reference | CIMP | Reference |
|-----------|------------------------------------|----------------------------------------------|-----------|------|-----------|
| RKO       | Colon carcinoma                    | Deficient, <i>MLH1</i> biallelic methylation | [1]       | High | [2]       |
| HCT15     | Colon adenocarcinoma               | Deficient, <i>MLH6</i> homozygous mutation   | [3,4]     | High | [2]       |
| HCT116    | Colorectal carcinoma               | Deficient, <i>MLH1</i> hemizygous mutation   | [5]       | High | [2]       |
| SKOV3     | Ovarian serous adenocarcinoma      | Deficient, Mutation in <i>MLH1</i>           | [3,6]     | High | [7]       |
| ES2       | Ovarian clear cell adenocarcinoma  | Deficient                                    | [1]       | High | [7]       |
| HEC59     | Uterine endometrial carcinoma      | Deficient, <i>MSH2</i> biallelic mutations   | [3,8]     | High | [2]       |
| AN3CA     | Uterine endometrial adenocarcinoma | Deficient, <i>MLH1</i> biallelic methylation | [1,9]     | High | [2]       |

## References

1. Veigl ML, Kasturi L, Olechnowicz J, Ma AH, Lutterbaugh JD, Periyasamy S et al. Biallelic inactivation of hMLH1 by epigenetic gene silencing, a novel mechanism causing human MSI cancers. *Proceedings of the National Academy of Sciences of the United States of America*. 1998;95(15):8698-702.
2. Joensuu EI, Abdel-Rahman WM, Ollikainen M, Ruosaari S, Knuutila S, Peltomaki P. Epigenetic signatures of familial cancer are characteristic of tumor type and family category. *Cancer research*. 2008;68(12):4597-605. doi:10.1158/0008-5472.CAN-07-6645.
3. Boyer JC, Umar A, Risinger JI, Lipford JR, Kane M, Yin S et al. Microsatellite instability, mismatch repair deficiency, and genetic defects in human cancer cell lines. *Cancer research*. 1995;55(24):6063-70.
4. Papadopoulos N, Nicolaides NC, Liu B, Parsons R, Lengauer C, Palombo F et al. Mutations of GTBP in genetically unstable cells. *Science*. 1995;268(5219):1915-7.
5. Papadopoulos N, Nicolaides NC, Wei YF, Ruben SM, Carter KC, Rosen CA et al. Mutation of a mutL homolog in hereditary colon cancer. *Science*. 1994;263(5153):1625-9.
6. Kim JH, Skates SJ, Uede T, Wong KK, Schorge JO, Feltmate CM et al. Osteopontin as a potential diagnostic biomarker for ovarian cancer. *Jama*. 2002;287(13):1671-9.
7. Niskakoski A, Kaur S, Staff S, Renkonen-Sinisalo L, Lassus H, Jarvinen HJ et al. Epigenetic analysis of sporadic and Lynch-associated ovarian cancers reveals histology-specific patterns of DNA methylation. *Epigenetics : official journal of the DNA Methylation Society*. 2014;9(12):1577-87. doi:10.4161/15592294.2014.983374.
8. Umar A, Koi M, Risinger JI, Glaab WE, Tindall KR, Kolodner RD et al. Correction of hypermutability, N-methyl-N'-nitro-N-nitrosoguanidine resistance, and defective DNA mismatch repair by introducing chromosome 2 into human tumor cells with mutations in MSH2 and MSH6. *Cancer research*. 1997;57(18):3949-55.
9. Kane MF, Loda M, Gaida GM, Lipman J, Mishra R, Goldman H et al. Methylation of the hMLH1 promoter correlates with lack of expression of hMLH1 in sporadic colon tumors and mismatch repair-defective human tumor cell lines. *Cancer research*. 1997;57(5):808-11.
