# Supplementary material for: DNA hypermethylation appears early and shows increased frequency with dysplasia in Lynch syndrome-associated colorectal adenomas and carcinomas
Source: PubMed Central journal article supplement (PMC4511034; doi:10.1186/s13148-015-0102-4), 2015-07-22

**Suppl. Fig. 2.** Significant correlation between *SFRP1* ( $r = -0.688$ ,  $p = 0.001$ ) and *SFRP2* ( $r = -0.657$ ,  $p = 0.002$ ) mRNA expression and methylation. Tissue origin of cell lines is specified in Suppl. table 4. NC, normal colon; NE, normal endometrium; T, 5-aza-CdR and TSA treated cell line (without T, untreated).

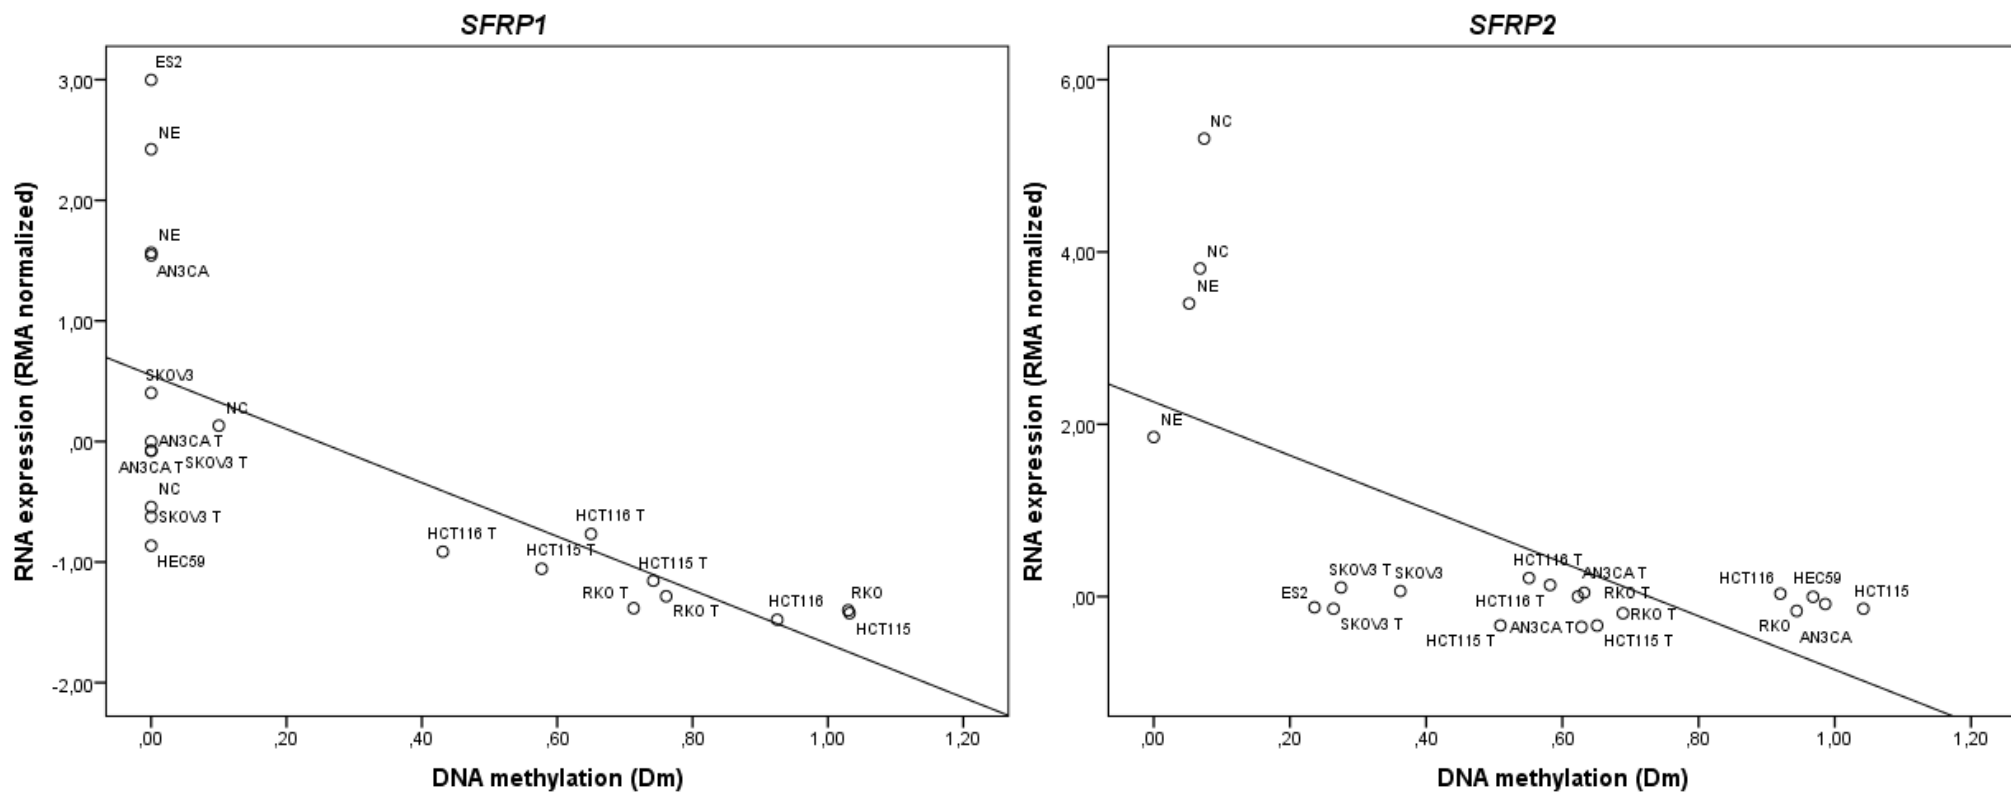

Supplement: 13148_2015_102_MOESM6_ESM.pdf [file 13148_2015_102_MOESM6_ESM.pdf]
