# Supplementary material for: DNA hypermethylation appears early and shows increased frequency with dysplasia in Lynch syndrome-associated colorectal adenomas and carcinomas
Source: PubMed Central journal article supplement (PMC4511034; doi:10.1186/s13148-015-0102-4), 2015-07-22

**Suppl. Fig. 3. Correlation of age and normal colonic mucosa methylation. (A)** Strong correlation between age at biopsy and normal mucosa *IGF2* probes I ( $r=0.694$ ,  $p<0.0001$ ), II ( $r=0.726$ ,  $p<0.0001$ ) and III ( $r=0.742$ ,  $p<0.0001$ ) Dm values. **(B)** Strong correlation between age at biopsy and normal mucosa *NEUROG1* probes I ( $r=0.566$ ,  $p<0.0001$ ), III ( $r=0.703$ ,  $p<0.0001$ ) and IV ( $r=0.655$ ,  $p<0.0001$ ) Dm values. **(C)** Moderate correlation between age at biopsy and normal mucosa *SFRP1* ( $r=0.554$ ,  $p<0.0001$ ), *SFRP2* ( $r=0.550$ ,  $p<0.0001$ ) and *SLC5A8* ( $r=0.554$ ,  $p<0.0001$ ) Dm values.

**A.**

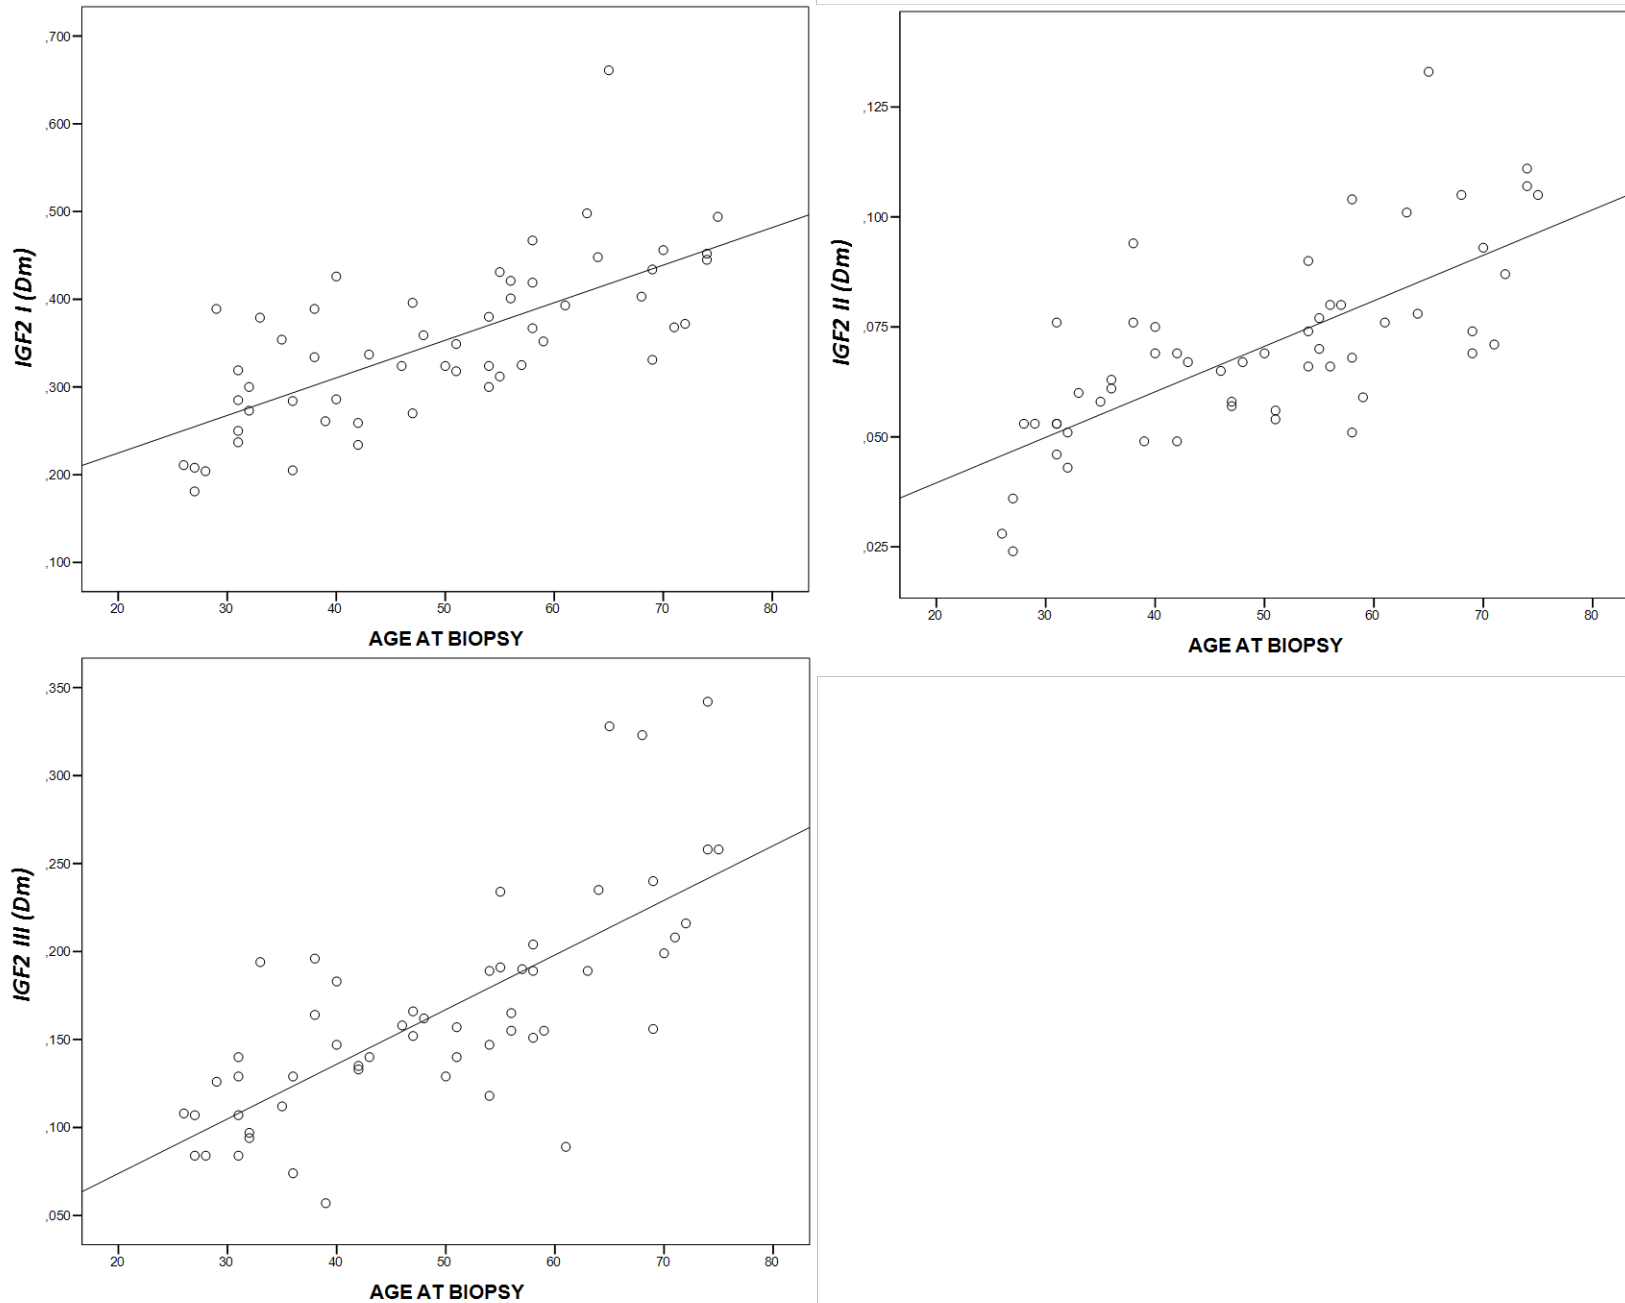

B.

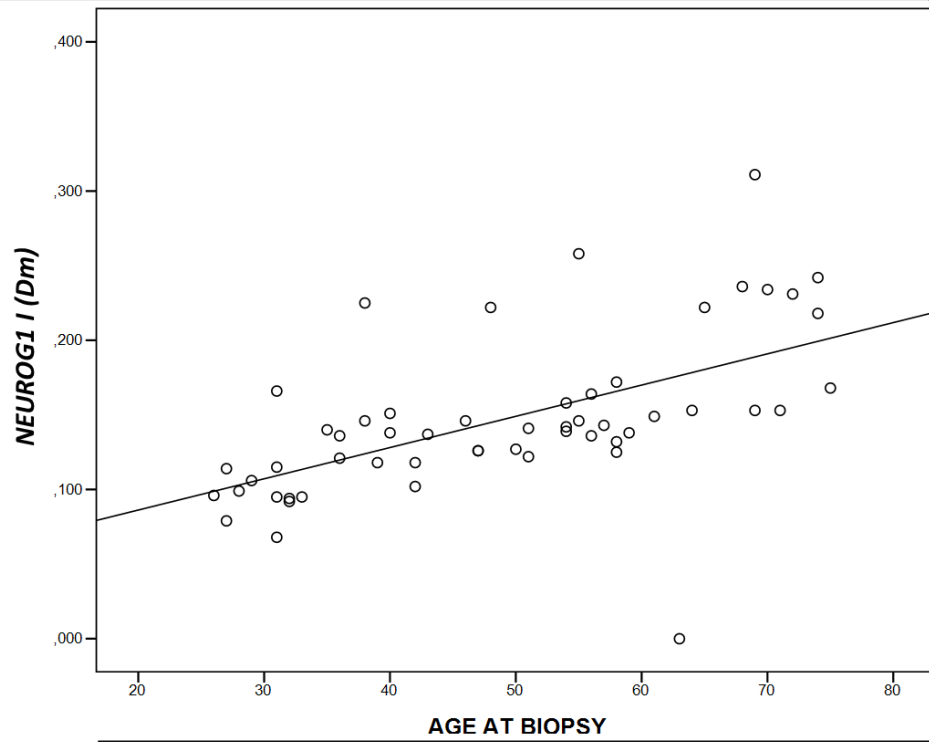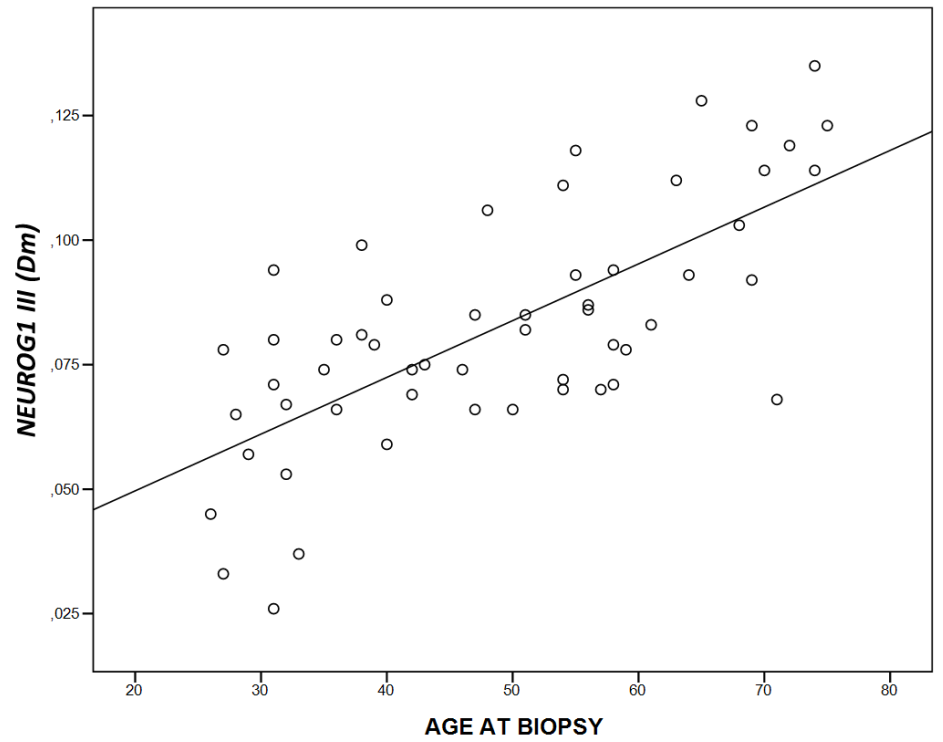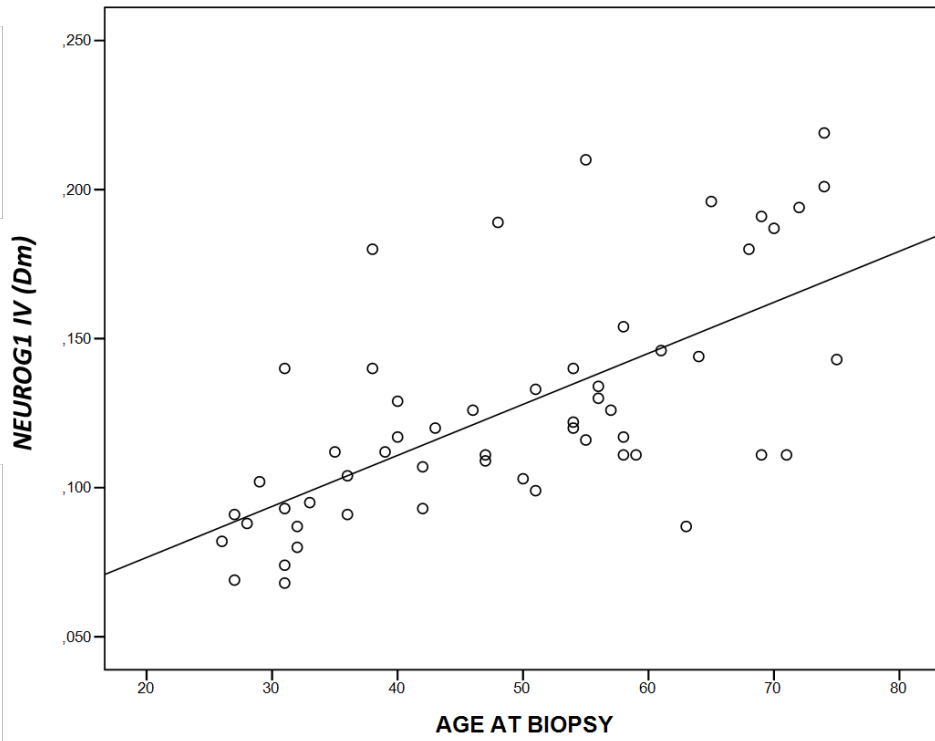

c.

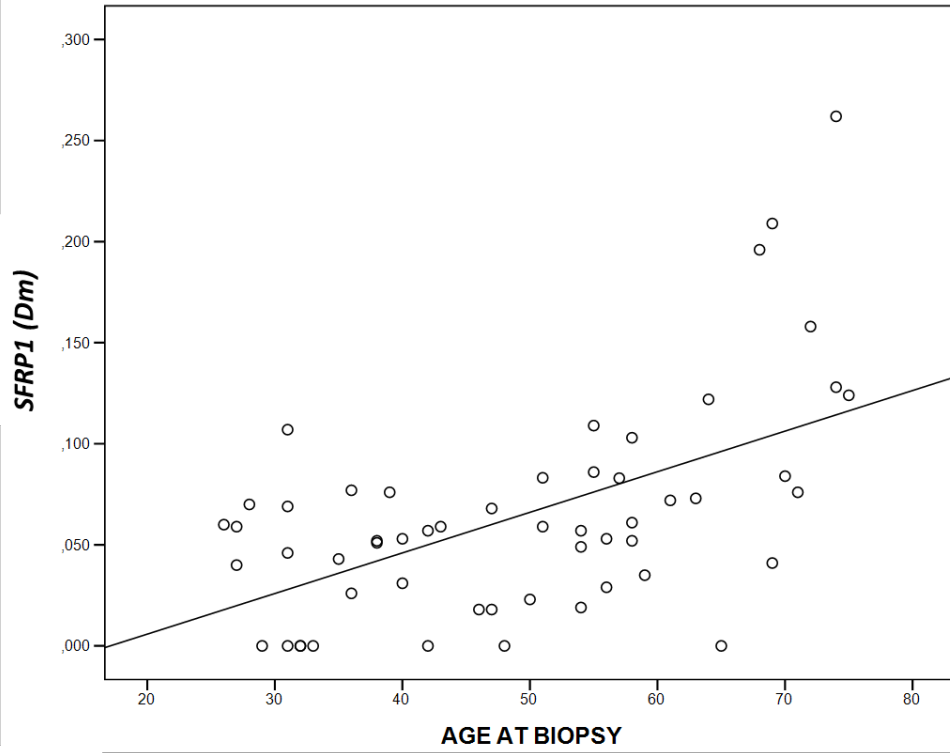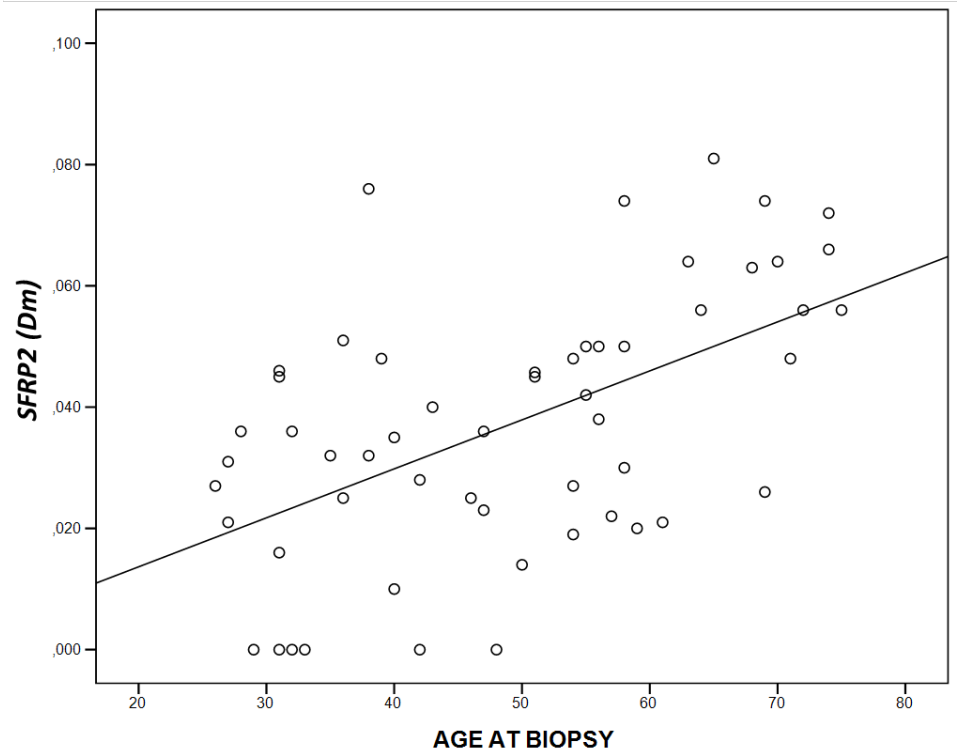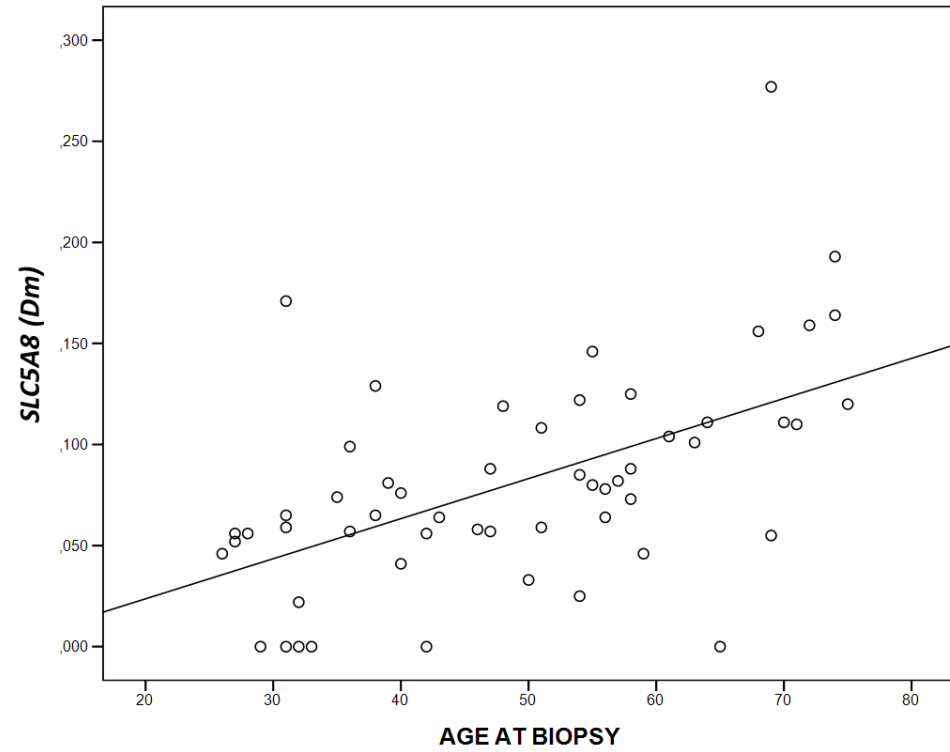

Supplement: 13148_2015_102_MOESM7_ESM.pdf [file 13148_2015_102_MOESM7_ESM.pdf]
