# Supplementary material for: DNA hypermethylation appears early and shows increased frequency with dysplasia in Lynch syndrome-associated colorectal adenomas and carcinomas
Source: PubMed Central journal article supplement (PMC4511034; doi:10.1186/s13148-015-0102-4), 2015-07-22

**Suppl. Fig. 4. Effect of aging and previously diagnosed CRC on normal colonic mucosa methylation. (A) IGF2 (probes I-III) and (B) NEUROG1 (probes I,III,IV and VI) normal mucosa Dm values.** Study groups: Patients 50 years old and younger with no CRC diagnosed (n=22) and CRC diagnosed (n=6) and patients over 50 years old with no CRC diagnosed (n=17) and CRC diagnosed (n=10). Statistics was performed by One-way ANOVA, post hoc test Tukey for pairwise comparisons or non-parametric test Kruskal-Wallis 1-way ANOVA (k samples), pairwise comparisons. Homogeneity of variances was tested by Levene's test and normality by Shapiro-Wilk test of normality.

**A.**

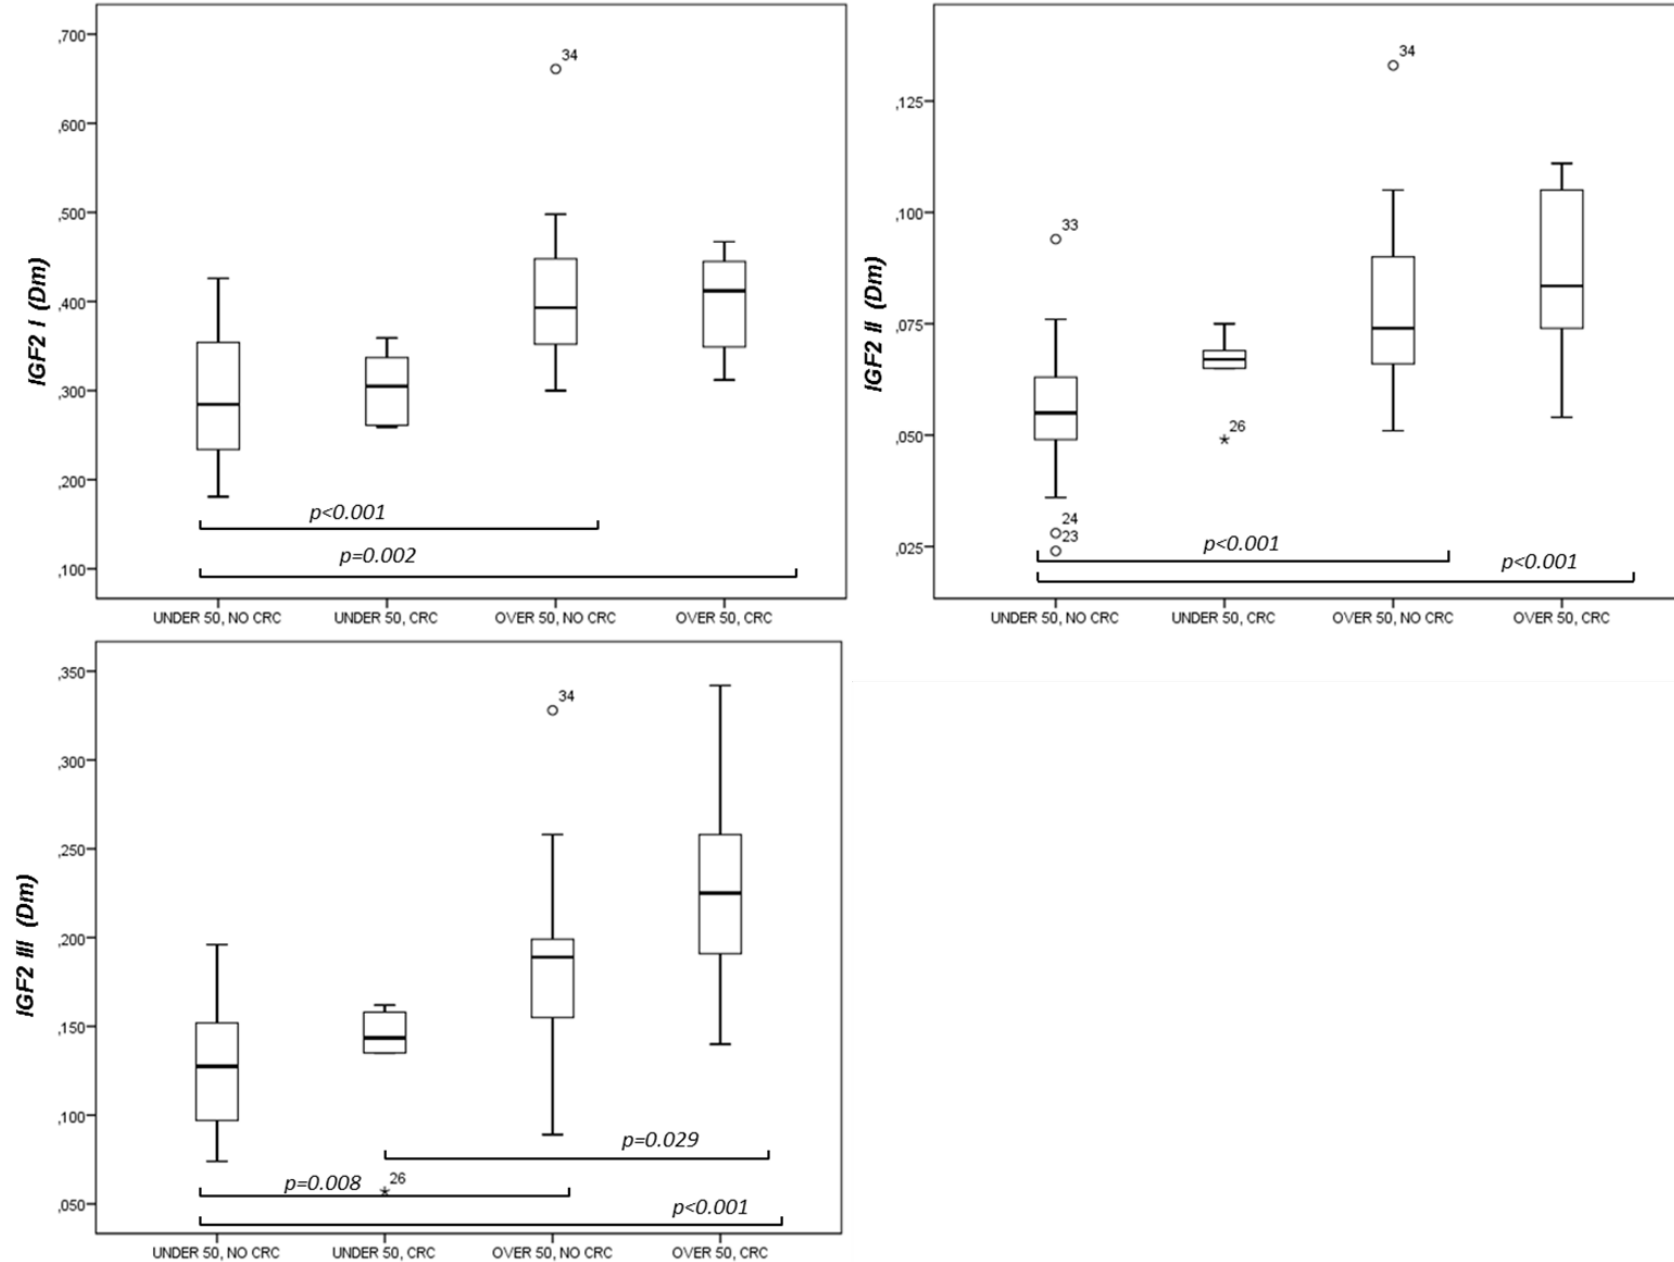

B.

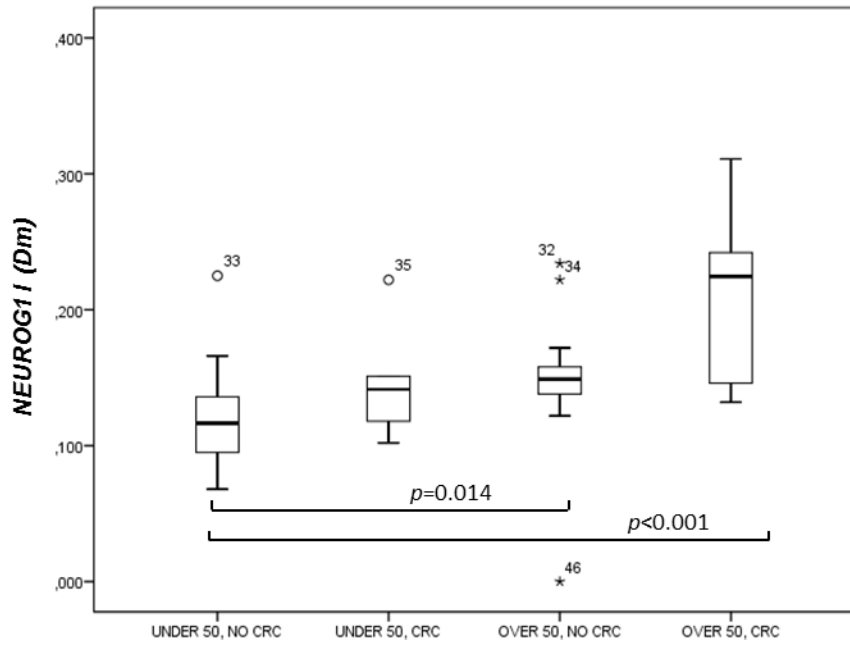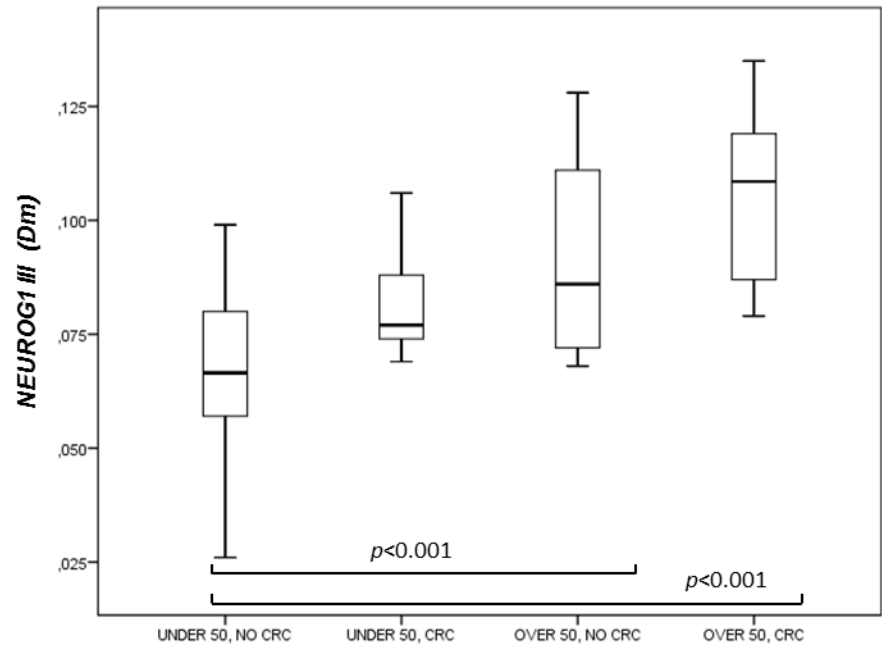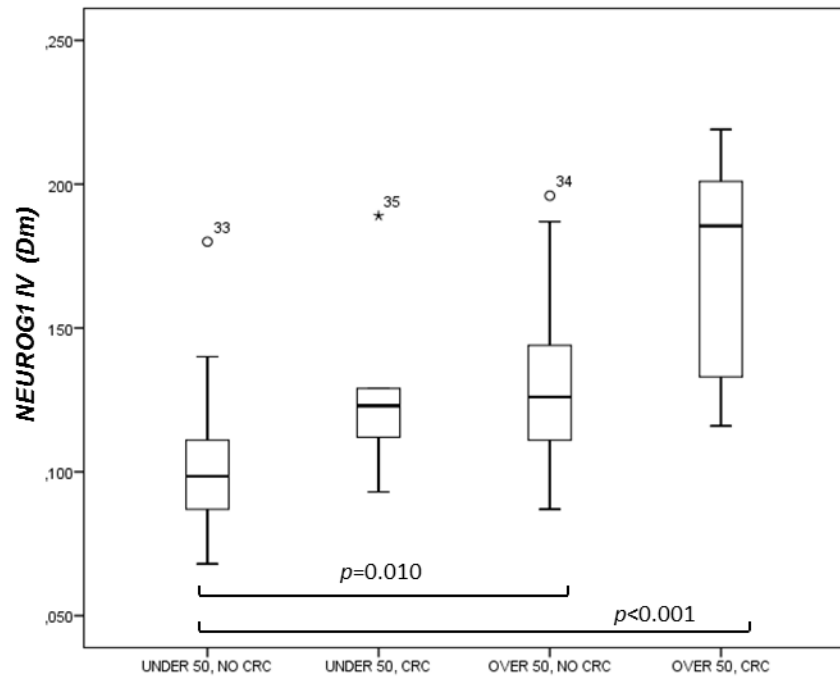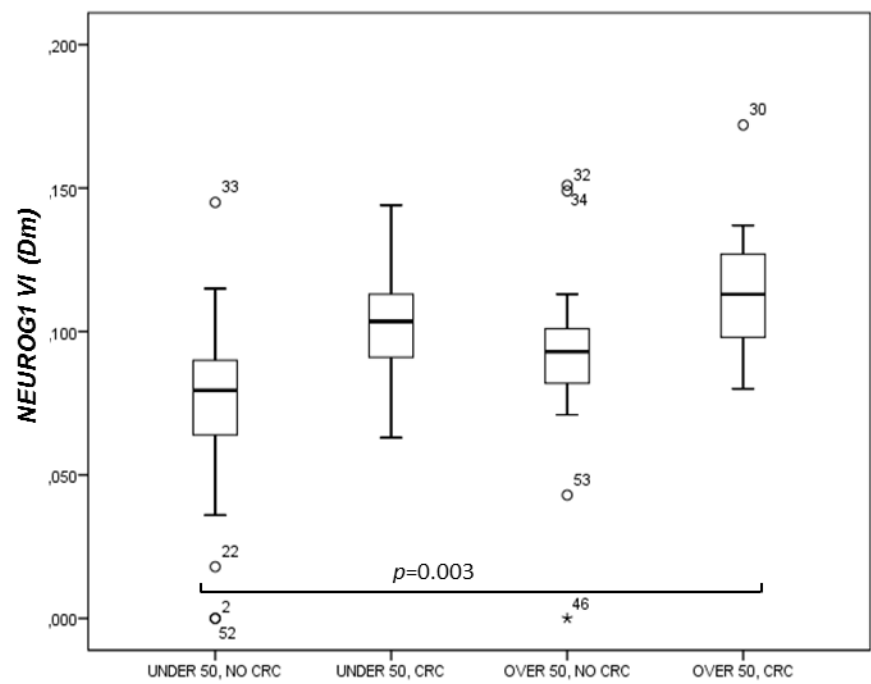

Supplement: 13148_2015_102_MOESM8_ESM.pdf [file 13148_2015_102_MOESM8_ESM.pdf]
