# Supplementary material for: DNA hypermethylation appears early and shows increased frequency with dysplasia in Lynch syndrome-associated colorectal adenomas and carcinomas
Source: PubMed Central journal article supplement (PMC4511034; doi:10.1186/s13148-015-0102-4), 2015-07-22
Supplement: 13148_2015_102_MOESM10_ESM.pdf [file 13148_2015_102_MOESM10_ESM.pdf]

**Suppl. Table 5.** Germline mutation specifications for patients included in the retrospective tumor analysis.

| <b>Mutation</b>              | <b>Transcript</b> | <b>HVGS protein</b>            | <b>No. of individuals with mutation</b> |
|------------------------------|-------------------|--------------------------------|-----------------------------------------|
| MLH1 c.1732-2941_1896+432del | NM_000249.3       | p.Pro579_Glu633del             | 22                                      |
| MLH1 c.454-1G>A              | NM_000249.3       | p.Glu153Phefs*8                | 5                                       |
| MLH1 c.1975C>T               | NM_000249.3       | p.Arg659*                      | 2                                       |
| MLH1 c.546-2A>G              | NM_000249.3       | p.Arg182Serfs*6                | 1                                       |
| MLH1 c.307-?_545+?del        | NM_000249.3       | p.Ala103Valfs*9                | 1                                       |
| MLH1 c.543C>G                | NM_000249.3       | p.Gly181Gly, p.(Glu153Phefs*8) | 1                                       |
| MLH1 c.1039-1G>A             | NM_000249.3       | p.Thr347Lysfs*8                | 1                                       |
| MSH2 c.696_697delTT          | NM_000251.1       | p.Ser233Hisfs*22               | 3                                       |
| MSH2 c.1807G>A               | NM_000251.1       | p.Asp603Asn                    | 2                                       |
| MSH2 c.1553_1554_delCA       | NM_000251.1       | p.Gln518Leufs*10               | 1                                       |
| MSH2 c.1667_1671delGACTT     | NM_000251.1       | p.Leu556Phefs*4                | 1                                       |
| MSH6 c.900dupG               | NM_000179.2       | p.Lys301Glufs*11               | 1                                       |
| MSH6 c.3013C>T               | NM_000179.2       | p.Arg1005*                     | 1                                       |
| MSH6 c.3306delT              | NM_000179.2       | p.Phe1104Leufs*11              | 1                                       |

Total 43
